# Supplementary material for: Anatomy, transcription dynamics and evolution of wheat ribosomal RNA loci deciphered by a multi-omics approach
Source: bioRxiv or medRxiv preprint supplement (doi:10.1101/2020.08.29.273623), 2021-02-17
Supplement: Supplementary file [file media-1.pdf]

**Suppl. Table S1. Optical map statistics**

|           | <b>Chromosome arm</b>               | <b>1AS</b> | <b>1BS</b> | <b>6BS</b> | <b>5DS</b> |
|-----------|-------------------------------------|------------|------------|------------|------------|
| Input     | <b>No. of arms sorted (million)</b> | 4          | 4          | 3.6        | 4.5        |
|           | <b>DNA amount (µg)</b>              | 2.2        | 2.6        | 3          | 1.2        |
| Molecules | <b>Labelling chemistry</b>          | NLRS       | NLRS       | NLRS       | DLS        |
|           | <b>Raw data &gt; 150 kb (Gb)</b>    | 75         | 320        | 124        | 81         |
|           | <b>Filtered molecules N50 (kb)</b>  | 209        | 197        | 207        | 227        |
|           | <b>Arm coverage</b>                 | 273x       | 1019x      | 298x       | 315x       |
| Assembly  | <b>No. of contigs</b>               | 300        | 369        | 566        | 35         |
|           | <b>Assembly length (Mb)</b>         | 222        | 294        | 360        | 208        |
|           | <b>Contig N50 (Mb)</b>              | 0.9        | 1.49       | 0.93       | 21         |
|           | <b>Average contig length (Mb)</b>   | 0.74       | 0.8        | 0.64       | 5.85       |

**Suppl. Table S2. Frequency of allelic variants in diagnostic SNPs in Illumina reads of flow-sorted chromosome arms**

|            | SNP (position#) | 6BS-1 (5090) |      | 6BS-2 (5348) |      | 1BS-1 (5533) |      | 1BS-2 (8010) |      | 5DS-1 (5300) |       | 5DS-2 (8000) |      |
|------------|-----------------|--------------|------|--------------|------|--------------|------|--------------|------|--------------|-------|--------------|------|
|            |                 | No.          | %    | No.          | %    | No.          | %    | No.          | %    | No.          | %     | No.          | %    |
| <b>1AS</b> | A               | 2            | 0,7  | 17           | 7,8  | 0            | 0,0  | 0            | 0,0  | 0            | 0,0   | 53           | 25,7 |
|            | C               | 1            | 0,4  | 12           | 5,5  | 199          | 85,4 | 169          | 77,5 | 189          | 93,1  | 153          | 74,3 |
|            | T               | 18           | 6,6  | 17           | 7,8  | 24           | 10,3 | 48           | 22,0 | 14           | 6,9   | 0            | 0,0  |
|            | G               | 251          | 92,3 | 172          | 78,9 | 10           | 4,3  | 1            | 0,5  | 0            | 0,0   | 0            | 0,0  |
|            | -               | 0            | 0,0  | 0            | 0,0  | 0            | 0,0  | 0            | 0,0  | 0            | 0,0   | 0            | 0,0  |
|            | Total           | 272          |      | 218          |      | 233          |      | 218          |      | 203          |       | 206          |      |
| <b>1BS</b> | A               | 12           | 0,1  | 31           | 0,3  | 13           | 0,1  | 11           | 0,1  | 3            | 0,0   | 17467        | 99,3 |
|            | C               | 14           | 0,1  | 1            | 0,0  | 747          | 5,5  | 123          | 0,7  | 6424         | 99,8  | 106          | 0,6  |
|            | T               | 69           | 0,4  | 45           | 0,4  | 12749        | 94,1 | 18256        | 99,0 | 3            | 0,0   | 6            | 0,0  |
|            | G               | 16379        | 99,3 | 10075        | 99,2 | 25           | 0,2  | 41           | 0,2  | 3            | 0,0   | 9            | 0,1  |
|            | -               | 17           | 0,1  | 4            | 0,0  | 10           | 0,1  | 6            | 0,0  | 5            | 0,1   | 8            | 0,0  |
|            | Total           | 16491        |      | 10156        |      | 13544        |      | 18437        |      | 6438         |       | 17596        |      |
| <b>6BS</b> | A               | 2            | 0,3  | 0            | 0,0  | 2            | 0,1  | 2            | 0,3  | 0            | 0,0   | 676          | 98,7 |
|            | C               | 2            | 0,3  | 0            | 0,0  | 2982         | 99,5 | 738          | 97,7 | 55           | 100,0 | 6            | 0,9  |
|            | T               | 714          | 94,3 | 346          | 98,6 | 11           | 0,4  | 14           | 1,9  | 0            | 0,0   | 2            | 0,3  |
|            | G               | 39           | 5,2  | 5            | 1,4  | 1            | 0,0  | 1            | 0,1  | 0            | 0,0   | 0            | 0,0  |
|            | -               | 0            | 0,0  | 0            | 0,0  | 1            | 0,0  | 0            | 0,0  | 0            | 0,0   | 1            | 0,1  |
|            | Total           | 757          |      | 351          |      | 2997         |      | 755          |      | 55           |       | 685          |      |
| <b>5DS</b> | A               | 2            | 0,2  | 3            | 0,5  | 0            | 0,0  | 0            | 0,0  | 0            | 0,0   | 74           | 13,3 |
|            | C               | 0            | 0,0  | 0            | 0,0  | 763          | 95,9 | 540          | 97,1 | 47           | 13,9  | 484          | 86,7 |
|            | T               | 110          | 9,0  | 45           | 7,7  | 32           | 4,0  | 16           | 2,9  | 290          | 86,1  | 0            | 0,0  |
|            | G               | 1117         | 90,9 | 533          | 91,7 | 1            | 0,1  | 0            | 0,0  | 0            | 0,0   | 0            | 0,0  |
|            | -               | 0            | 0,0  | 0            | 0,0  | 0            | 0,0  | 0            | 0,0  | 0            | 0,0   | 0            | 0,0  |
|            | Total           | 1229         |      | 581          |      | 796          |      | 556          |      | 337          |       | 558          |      |

6BS variant

1BS variant

5DS variant

Non-B variant

# SNP position in the wheat 45S rDNA consensus  
Chromosomal Illumina reads obtained from IWGSC, 2014

**Suppl. Table S3. Frequency of allelic variants at diagnostic SNPs in Illumina reads from three wheat 'Chinese Spring' genome projects**

|                       | SNP (position <sup>#</sup> )                 | 6BS-1 (5090) |       | 6BS-2 (5348) |       | 1BS-1 (5533) |       | 1BS-2 (8010) |       | 5DS-1 (5300) |       | 5DS-2 (8000)  |       |
|-----------------------|----------------------------------------------|--------------|-------|--------------|-------|--------------|-------|--------------|-------|--------------|-------|---------------|-------|
|                       |                                              | No.          | %     | No.          | %     | No.          | %     | No.          | %     | No.          | %     | No.           | %     |
| <b>RefSeq v1.0*</b>   | A                                            | 16           | 0,0   | 74           | 0,2   | 19           | 0,1   | 31           | 0,1   | 13           | 0,0   | 33196         | 95,1  |
|                       | C                                            | 10           | 0,0   | 92           | 0,3   | 23647        | 64,5  | 21183        | 62,7  | 31952        | 95,7  | 1676          | 4,8   |
|                       | T                                            | 19583        | 55,9  | 18822        | 57,3  | 12951        | 35,3  | 12538        | 37,1  | 1385         | 4,2   | 10            | 0,0   |
|                       | G                                            | 15438        | 44,0  | 13886        | 42,2  | 48           | 0,1   | 27           | 0,1   | 23           | 0,1   | 23            | 0,1   |
|                       | -                                            | 0            | 0,0   | 1            | 0,0   | 0            | 0,0   | 1            | 0,0   | 0            | 0,0   | 0             | 0,0   |
|                       | <b>Total</b>                                 |              | 35047 |              | 32875 |              | 36665 |              | 33780 |              | 33373 |               | 34905 |
| <b>Triticum 3.1**</b> | A                                            | 16           | 0,0   | 73           | 0,2   | 12           | 0,0   | 27           | 0,1   | 4            | 0,0   | 49039         | 95,3  |
|                       | C                                            | 12           | 0,0   | 74           | 0,2   | 31233        | 60,0  | 30399        | 58,9  | 44175        | 95,8  | 2354          | 4,6   |
|                       | T                                            | 28604        | 53,0  | 24443        | 53,9  | 20747        | 39,8  | 21135        | 41,0  | 1915         | 4,2   | 27            | 0,1   |
|                       | G                                            | 25301        | 46,9  | 20796        | 45,8  | 70           | 0,1   | 28           | 0,1   | 24           | 0,1   | 30            | 0,1   |
|                       | -                                            | 0            | 0,0   | 0            | 0,0   | 1            | 0,0   | 0            | 0,0   | 0            | 0,0   | 0             | 0,0   |
|                       | <b>Total</b>                                 |              | 53933 |              | 45386 |              | 52063 |              | 51589 |              | 46118 |               | 51450 |
| <b>TGACv1 ***</b>     | A                                            | 1            | 0,0   | 13           | 0,2   | 3            | 0,0   | 1            | 0,0   | 2            | 0,0   | 6263          | 94,9  |
|                       | C                                            | 1            | 0,0   | 0            | 0,0   | 5565         | 67,7  | 3894         | 59,5  | 6960         | 96,0  | 328           | 5,0   |
|                       | T                                            | 4083         | 56,2  | 4548         | 63,1  | 2638         | 32,1  | 2642         | 40,4  | 286          | 3,9   | 5             | 0,1   |
|                       | G                                            | 3180         | 43,8  | 2643         | 36,7  | 11           | 0,1   | 8            | 0,1   | 1            | 0,0   | 6             | 0,1   |
|                       | -                                            | 0            | 0,0   | 0            | 0,0   | 0            | 0,0   | 0            | 0,0   | 0            | 0,0   | 0             | 0,0   |
|                       | <b>Total</b>                                 |              | 7265  |              | 7204  |              | 8217  |              | 6545  |              | 7249  |               | 6602  |
|                       |                                              | 6BS variant  |       |              |       | 1BS variant  |       |              |       | 5DS variant  |       | Non-B variant |       |
| #                     | SNP position in the wheat 45S rDNA consensus |              |       |              |       |              |       |              |       |              |       |               |       |
| *                     | IWGSC, 2018                                  |              |       |              |       |              |       |              |       |              |       |               |       |
| **                    | Zimin et al., 2017                           |              |       |              |       |              |       |              |       |              |       |               |       |
| ***                   | Clavijo et al., 2017                         |              |       |              |       |              |       |              |       |              |       |               |       |

**Suppl. Table S4. RNA-seq data**

| Tissue         | Sample | Read length<br>(bp) | Trimmed raw data |  | Reads after cp/mt rDNA removal |            | Input<br>(MSeq) | No. of reads mapped to full rDNA unit |            | No. of reads mapped to ETS/IGS subregion |            |
|----------------|--------|---------------------|------------------|--|--------------------------------|------------|-----------------|---------------------------------------|------------|------------------------------------------|------------|
|                |        |                     | (MSeq)           |  | (MSeq)                         | Percentage |                 | Counts                                | Percentage | Counts                                   | Percentage |
| Embryo 1       | 98219  | 148                 | 14.8             |  | 14.6                           | 98.6       | 2               | 1924225                               | 96.21125   | 2466                                     | 0.1233     |
| Embryo 2       | 98220  | 148                 | 15.2             |  | 15                             | 98.7       | 2               | 1919571                               | 95.97855   | 2221                                     | 0.11105    |
| Root tip 1     | 81007  | 122                 | 33.0             |  | 32.5                           | 98.5       | 2               | 1912845                               | 95.64225   | 1499                                     | 0.07495    |
| Root tip 2     | 81008  | 124                 | 32.7             |  | 32.2                           | 98.5       | 2               | 1910285                               | 95.51425   | 1464                                     | 0.0732     |
| Coleoptile 1   | 98221  | 148                 | 15.0             |  | 14.3                           | 95.3       | 2               | 1926102                               | 96.3051    | 2191                                     | 0.10955    |
| Coleoptile 2   | 98222  | 148                 | 14.8             |  | 12.4                           | 83.8       | 2               | 1931022                               | 96.5511    | 2181                                     | 0.10905    |
| Primary leaf 1 | 81009  | 123                 | 33.6             |  | 15.7                           | 46.7       | 2               | 1852931                               | 92.64655   | 106                                      | 0.0053     |
| Primary leaf 2 | 81010  | 127                 | 35.6             |  | 19                             | 53.4       | 2               | 1866803                               | 93.34015   | 101                                      | 0.00505    |
| Mature leaf 1  | 98226  | 148                 | 14.1             |  | 8.1                            | 57.4       | 2               | 1802848                               | 90.1424    | 392                                      | 0.0196     |
| Mature leaf 2  | 98227  | 148                 | 12.7             |  | 7.3                            | 57.5       | 2               | 1803440                               | 90.172     | 448                                      | 0.0224     |

**Suppl. Table S5. Variant analysis of 26S rRNA in different tissues.** The four informative SNPs were used to discriminate between transcription from 1BS and 6BS rDNA loci.

**Frequency of diagnostic nucleotides in mapped rRNA-seq Illumina reads**

| Tissue   |       |        | embryo |       | coleoptile |       | root tip |       | primary leaf |       | mature leaf |       |
|----------|-------|--------|--------|-------|------------|-------|----------|-------|--------------|-------|-------------|-------|
| Position | SNP   | Allele | 98219  | 98220 | 98221      | 98222 | 81007    | 81008 | 81009        | 81010 | 98226       | 98227 |
| 5090     | 6BS-1 | T      | 32.50  | 33.19 | 35.20      | 34.70 | 31.51    | 31.29 | 27.02        | 29.69 | 26.53       | 26.18 |
| 5090     |       | G      | 66.81  | 66.20 | 64.13      | 64.70 | 68.14    | 68.45 | 72.59        | 69.97 | 72.82       | 73.18 |
| 5348     | 6BS-2 | T      | 35.64  | 34.38 | 37.98      | 37.19 | 35.39    | 36.51 | 32.69        | 34.80 | 29.11       | 27.10 |
| 5348     |       | G      | 63.69  | 64.68 | 61.12      | 62.27 | 63.51    | 62.58 | 66.14        | 64.59 | 70.02       | 72.01 |
| 5533     | 1BS-1 | T      | 64.78  | 64.22 | 62.48      | 63.01 | 66.41    | 66.01 | 70.74        | 67.36 | 71.64       | 72.20 |
| 5533     |       | C      | 34.33  | 34.77 | 36.61      | 36.00 | 33.33    | 33.67 | 28.96        | 32.36 | 27.36       | 26.73 |
| 8010     | 1BS-2 | T      | 67.46  | 68.17 | 65.59      | 65.91 | 72.84    | 72.88 | 76.51        | 72.82 | 74.78       | 75.46 |
| 8010     |       | C      | 32.54  | 31.83 | 34.41      | 34.09 | 27.15    | 27.11 | 23.49        | 27.18 | 25.25       | 24.54 |

## Statistical evaluation of SNP frequencies between the tissues

### Statistical evaluation of differences in variant representation at the 5090 position of the 26S rRNA gene

|              |       | 81007         | 81008         | 81009          | 81010          | 98219         | 98220          | 98221          | 98222           | 98226           | 98227           |
|--------------|-------|---------------|---------------|----------------|----------------|---------------|----------------|----------------|-----------------|-----------------|-----------------|
| Root tip     | 81007 | -             | 0.456         | <u>171.461</u> | <u>27.923</u>  | <u>9.086</u>  | <u>26.58</u>   | <u>121.058</u> | <u>90.851</u>   | <u>255.332</u>  | <u>303.8</u>    |
| Root tip     | 81008 | 0.5141        | -             | <u>149.552</u> | <u>20.632</u>  | <u>48.906</u> | <u>32.638</u>  | <u>129.99</u>  | <u>99.387</u>   | <u>223.376</u>  | <u>267.137</u>  |
| Primary leaf | 81009 | <u>0.0001</u> | <u>0.0001</u> | -              | <u>149.552</u> | <u>59.946</u> | <u>268.307</u> | <u>344.801</u> | <u>570.133</u>  | <u>506.047</u>  | 2.444           |
| Primary leaf | 81010 | <u>0.0001</u> | <u>0.0001</u> | <u>0.0001</u>  | -              | <u>70.534</u> | <u>111.205</u> | <u>259.628</u> | <u>1004.195</u> | <u>33370.88</u> | <u>3621.379</u> |
| Embryo       | 98219 | <u>0.0026</u> | <u>0.0001</u> | <u>0.0001</u>  | <u>0.0001</u>  | -             | <u>4.805</u>   | <u>70.15</u>   | <u>46.667</u>   | <u>391.546</u>  | <u>456.878</u>  |
| Embryo       | 98220 | <u>0.0001</u> | <u>0.0001</u> | <u>0.0001</u>  | <u>0.0001</u>  | <u>0.0286</u> | -              | <u>40.305</u>  | <u>22.787</u>   | <u>497.852</u>  | <u>575.016</u>  |
| Coleoptile   | 98221 | <u>0.0001</u> | <u>0.0001</u> | <u>0.0001</u>  | <u>0.0001</u>  | <u>0.0001</u> | <u>0.0001</u>  | -              | 2.373           | <u>793.182</u>  | <u>894.841</u>  |
| Coleoptile   | 98222 | <u>0.0001</u> | <u>0.0001</u> | <u>0.0001</u>  | <u>0.0001</u>  | <u>0.0001</u> | <u>0.0001</u>  | 0.1234         | -               | <u>708.192</u>  | <u>802.6001</u> |
| Old leaf     | 98226 | <u>0.0001</u> | <u>0.0001</u> | <u>0.0001</u>  | <u>0.0001</u>  | <u>0.0001</u> | <u>0.0001</u>  | <u>0.0001</u>  | <u>0.0001</u>   | -               | 1.553           |
| Old leaf     | 98227 | <u>0.0001</u> | <u>0.0001</u> | <u>0.0001</u>  | <u>0.0001</u>  | <u>0.0001</u> | <u>0.0001</u>  | <u>0.0001</u>  | <u>0.0001</u>   | 0.2128          | -               |

### Statistical evaluation of differences in variant representation at 5348 position within the 26S rRNA gene

|              |       | 81007         | 81008         | 81009        | 81010         | 98219         | 98220         | 98221         | 98222         | 98226         | 98227         |
|--------------|-------|---------------|---------------|--------------|---------------|---------------|---------------|---------------|---------------|---------------|---------------|
| Root tip     | 81007 | -             | 0.659         | 1.032        | 0.476         | 1.843         | 0.123         | <u>10.032</u> | <u>6.736</u>  | <u>15.604</u> | <u>32.850</u> |
| Root tip     | 81008 | 0.4170        | -             | 1.032        | 0.476         | 1.843         | 0.247         | <u>5.320</u>  | <u>2.972</u>  | <u>22.957</u> | <u>43.241</u> |
| Primary leaf | 81009 | 0.3096        | 0.4170        | -            | 3.356         | <u>6.453</u>  | 2.068         | <u>20.149</u> | <u>15.142</u> | <u>15.142</u> | <u>9.853</u>  |
| Primary leaf | 81010 | 0.4901        | 0.4901        | 0.067        | -             | 3.356         | 0.121         | <u>7.219</u>  | <u>4.248</u>  | <u>24.328</u> | <u>46.584</u> |
| Embryo       | 98219 | 0.1746        | 0.1746        | <u>0.011</u> | 0.4683        | -             | 1.106         | 3.791         | 1.730         | <u>31.372</u> | <u>56.040</u> |
| Embryo       | 98220 | 0.1746        | 0.6194        | 0.150        | 0.7275        | 0.2929        | -             | <u>8.745</u>  | <u>5.535</u>  | <u>20.088</u> | <u>40.121</u> |
| Coleoptile   | 98221 | <u>0.0015</u> | <u>0.0211</u> | <u>0.000</u> | <u>0.0072</u> | 0.0515        | <u>0.0031</u> | -             | 0.4368        | <u>56.046</u> | <u>87.943</u> |
| Coleoptile   | 98222 | <u>0.0095</u> | <u>0.0847</u> | <u>0.000</u> | <u>0.0393</u> | 0.1884        | <u>0.0186</u> | 0.5087        | -             | <u>48.189</u> | <u>78.348</u> |
| Old leaf     | 98226 | <u>0.0001</u> | <u>0.0001</u> | <u>0.000</u> | <u>0.0001</u> | <u>0.0001</u> | <u>0.0001</u> | <u>0.0001</u> | <u>0.0001</u> | -             | 3.330         |
| Old leaf     | 98227 | <u>0.0001</u> | <u>0.0001</u> | <u>0.002</u> | <u>0.0001</u> | <u>0.0001</u> | <u>0.0001</u> | <u>0.0001</u> | <u>0.0001</u> | 0.06800       | -             |

Statistical evaluation of differences in variant representation at the 5533 position within the 26S rRNA gene

|              |       | 81007         | 81008         | 81009         | 81010         | 98219         | 98220         | 98221          | 98222          | 98226          | 98227          |
|--------------|-------|---------------|---------------|---------------|---------------|---------------|---------------|----------------|----------------|----------------|----------------|
| Root tip     | 81007 | -             | 0.4388        | 47.64         | 2.414         | 7.048         | 12.377        | <u>41.453</u>  | <u>30.720</u>  | <u>62.95</u>   | <u>77.25</u>   |
| Root tip     | 81008 | 0.5077        | -             | <u>58.679</u> | <u>5.083</u>  | <u>4.091</u>  | <u>8.402</u>  | <u>34.256</u>  | <u>24.479</u>  | <u>75.129</u>  | <u>90.889</u>  |
| Primary leaf | 81009 | 0.0001        | 0.5077        | -             | <u>30.579</u> | <u>92.091</u> | 107.173       | <u>179.570</u> | <u>155.826</u> | 1.862          | <u>4.877</u>   |
| Primary leaf | 81010 | 0.1203        | <u>0.0241</u> | <u>0.0001</u> | -             | <u>18.344</u> | <u>26.364</u> | <u>66.614</u>  | <u>57.548</u>  | <u>44.193</u>  | <u>56.562</u>  |
| Embryo       | 98219 | 0.0079        | <u>0.0430</u> | <u>0.0002</u> | <u>0.0001</u> | -             | 0.8040        | <u>14.408</u>  | <u>8.428</u>   | <u>110.509</u> | <u>129.344</u> |
| Embryo       | 98220 | 0.0005        | 0.0037        | <u>0.0003</u> | <u>0.0001</u> | 0.370         | -             | <u>8.103</u>   | <u>3.874</u>   | <u>126.088</u> | <u>145.887</u> |
| Coleoptile   | 98221 | <u>0.0001</u> | <u>0.0001</u> | <u>0.0004</u> | <u>0.0001</u> | 0.0015        | <u>0.0044</u> | -              | 0.782          | <u>200.250</u> | <u>225.567</u> |
| Coleoptile   | 98222 | <u>0.0001</u> | <u>0.0001</u> | <u>0.0005</u> | <u>0.0001</u> | 0.0037        | 0.0490        | 0.3765         | -              | <u>176.156</u> | <u>199.842</u> |
| Old leaf     | 98226 | <u>0.0001</u> | <u>0.0001</u> | 0.1724        | <u>0.0001</u> | <u>0.0001</u> | <u>0.0001</u> | <u>0.0001</u>  | <u>0.0001</u>  | -              | 0.6363         |
| Old leaf     | 98227 | <u>0.0001</u> | <u>0.0001</u> | <u>0.0272</u> | <u>0.0001</u> | <u>0.0001</u> | <u>0.0001</u> | <u>0.0001</u>  | <u>0.0001</u>  | 0.4251         | -              |

Statistical evaluation of differences in variant representation at the 8010 position within the 26S rRNA gene

|              |       | 81007         | 81008         | 81009         | 81010         | 98219          | 98220          | 98221          | 98222           | 98226          | 98227          |
|--------------|-------|---------------|---------------|---------------|---------------|----------------|----------------|----------------|-----------------|----------------|----------------|
| Root tip     | 81007 | -             | 0.035         | <u>83.078</u> | 0.001         | <u>112.462</u> | <u>88.274</u>  | <u>225.104</u> | <u>202.672</u>  | <u>232,230</u> | <u>113.008</u> |
| Root tip     | 81008 | 0.8525        | -             | <u>75.811</u> | 0.023         | <u>108.731</u> | <u>85.981</u>  | <u>224.876</u> | <u>193.754</u>  | <u>64.751</u>  | <u>101.413</u> |
| Primary leaf | 81009 | <u>0.0001</u> | <u>0.0001</u> | -             | <u>85.920</u> | <u>425.466</u> | <u>372.387</u> | <u>617.018</u> | <u>581.7703</u> | 4.197          | 0.003          |
| Primary leaf | 81010 | 0.9692        | 0.8788        | <u>0.0001</u> | -             | <u>22.860</u>  | <u>120.837</u> | <u>94.670</u>  | <u>241.430</u>  | <u>76.631</u>  | <u>6.503</u>   |
| Embryo       | 98219 | <u>0.0001</u> | <u>0.0001</u> | <u>0.0001</u> | <u>0.0001</u> | -              | 1.538          | <u>31.041</u>  | <u>20.957</u>   | <u>542.940</u> | <u>653.752</u> |
| Embryo       | 98220 | <u>0.0001</u> | <u>0.0001</u> | <u>0.0001</u> | <u>0.0001</u> | 0.2147         | -              | <u>43.925</u>  | <u>32.148</u>   | <u>459.757</u> | <u>561.219</u> |
| Coleoptile   | 98221 | <u>0.0001</u> | <u>0.0001</u> | <u>0.0001</u> | <u>0.0001</u> | <u>0.0001</u>  | <u>0.0001</u>  | -              | 1.0212          | <u>891.659</u> | <u>951.220</u> |
| Coleoptile   | 98222 | <u>0.0001</u> | <u>0.0001</u> | <u>0.0001</u> | <u>0.0001</u> | <u>0.0001</u>  | <u>0.0001</u>  | 0.3121         | -               | <u>771.025</u> | <u>897.922</u> |
| Old leaf     | 98226 | <u>0.0001</u> | <u>0.0001</u> | <u>0.0405</u> | <u>0.0001</u> | <u>0.0001</u>  | <u>0.0001</u>  | <u>0.0001</u>  | <u>0.0001</u>   | -              | 1.8186         |
| Old leaf     | 98227 | <u>0.0001</u> | <u>0.0001</u> | 0.9559        | <u>0.0108</u> | <u>0.0001</u>  | <u>0.0001</u>  | <u>0.0001</u>  | <u>0.0001</u>   | 0.1775         | -              |

Footnote:

Above the diagonal - Pearson's chi square values

Below the diagonal - p values

In blue - moderately significant (P<0.05)

In blue and underlined - highly significant (P<0.001)

In red - differences between biological replicas

Suppl. Table S6. FPKM values for nuclear, chloroplast and mitochondrial 16S/18S and 23/26S rRNAs across five tissues.

| averaged FPKM     | embryo | coleoptile | root tip | primary leaf | mature leaf |
|-------------------|--------|------------|----------|--------------|-------------|
| nuclear 18S       | 97491  | 132376     | 183671   | 384204       | 150118      |
| nuclear 26S       | 89297  | 121003     | 137503   | 290130       | 130916      |
| chloroplast 16S   | 189    | 2710       | 219      | 170745       | 73903       |
| chloroplast 23S   | 229    | 3165       | 173      | 177475       | 86062       |
| mitochondrial 18S | 559    | 642        | 463      | 737          | 657         |
| mitochondrial 26S | 552    | 577        | 588      | 860          | 580         |

FPKM - Fragments Per Kilobase of exon per Million reads

Suppl. Table S7. DeSeq2 results table with A: log2 fold changes and B: adjusted p values behind the heatmap and its color-code

A

| log2fold change   | coleoptile  | root tip     | primary leaf | mature leaf |
|-------------------|-------------|--------------|--------------|-------------|
| nuclear 18S       | 0,441310212 | 0,913788019  | 1,978536511  | 0,622763214 |
| nuclear 26S       | 0,438360179 | 0,622776541  | 1,700016039  | 0,551954843 |
| chloroplast 16S   | 3,840917255 | 0,21057889   | 9,818565181  | 8,610426266 |
| chloroplast 23S   | 3,785877305 | -0,407878955 | 9,595116148  | 8,550945427 |
| mitochondrial 18S | 0,200205379 | -0,273384147 | 0,399766864  | 0,234100439 |
| mitochondrial 26S | 0,064613786 | 0,089848912  | 0,63898758   | 0,07071563  |
| <b>B</b>          |             |              |              |             |
| padj              | coleoptile  | root tip     | primary leaf | mature leaf |
| nuclear 18S       | 0,057516924 | 4,58E-07     | 4,89E-37     | 0,000517994 |
| nuclear 26S       | 0,089432246 | 0,004991001  | 4,09E-24     | 0,005251552 |
| chloroplast 16S   | 1,40E-50    | 0,906501206  | 0            | 1,69E-262   |
| chloroplast 23S   | 6,68E-41    | 0,631579214  | 9,39E-272    | 1,10E-215   |
| mitochondrial 18S | 0,788016196 | 0,622825014  | 0,099563837  | 0,377639271 |
| mitochondrial 26S | 0,993735334 | 0,972848182  | 0,000840141  | 0,804892936 |

| fold change       | coleoptile | root tip | primary leaf | mature leaf |
|-------------------|------------|----------|--------------|-------------|
| nuclear 18S       | 1,36       | 1,88     | 3,94         | 1,54        |
| nuclear 26S       | 1,36       | 1,54     | 3,25         | 1,47        |
| chloroplast 16S   | 14,33      | 1,16     | 902,99       | 390,84      |
| chloroplast 23S   | 13,79      | 0,75     | 773,42       | 375,05      |
| mitochondrial 18S | 1,15       | 0,83     | 1,32         | 1,18        |
| mitochondrial 26S | 1,05       | 1,06     | 1,56         | 1,05        |



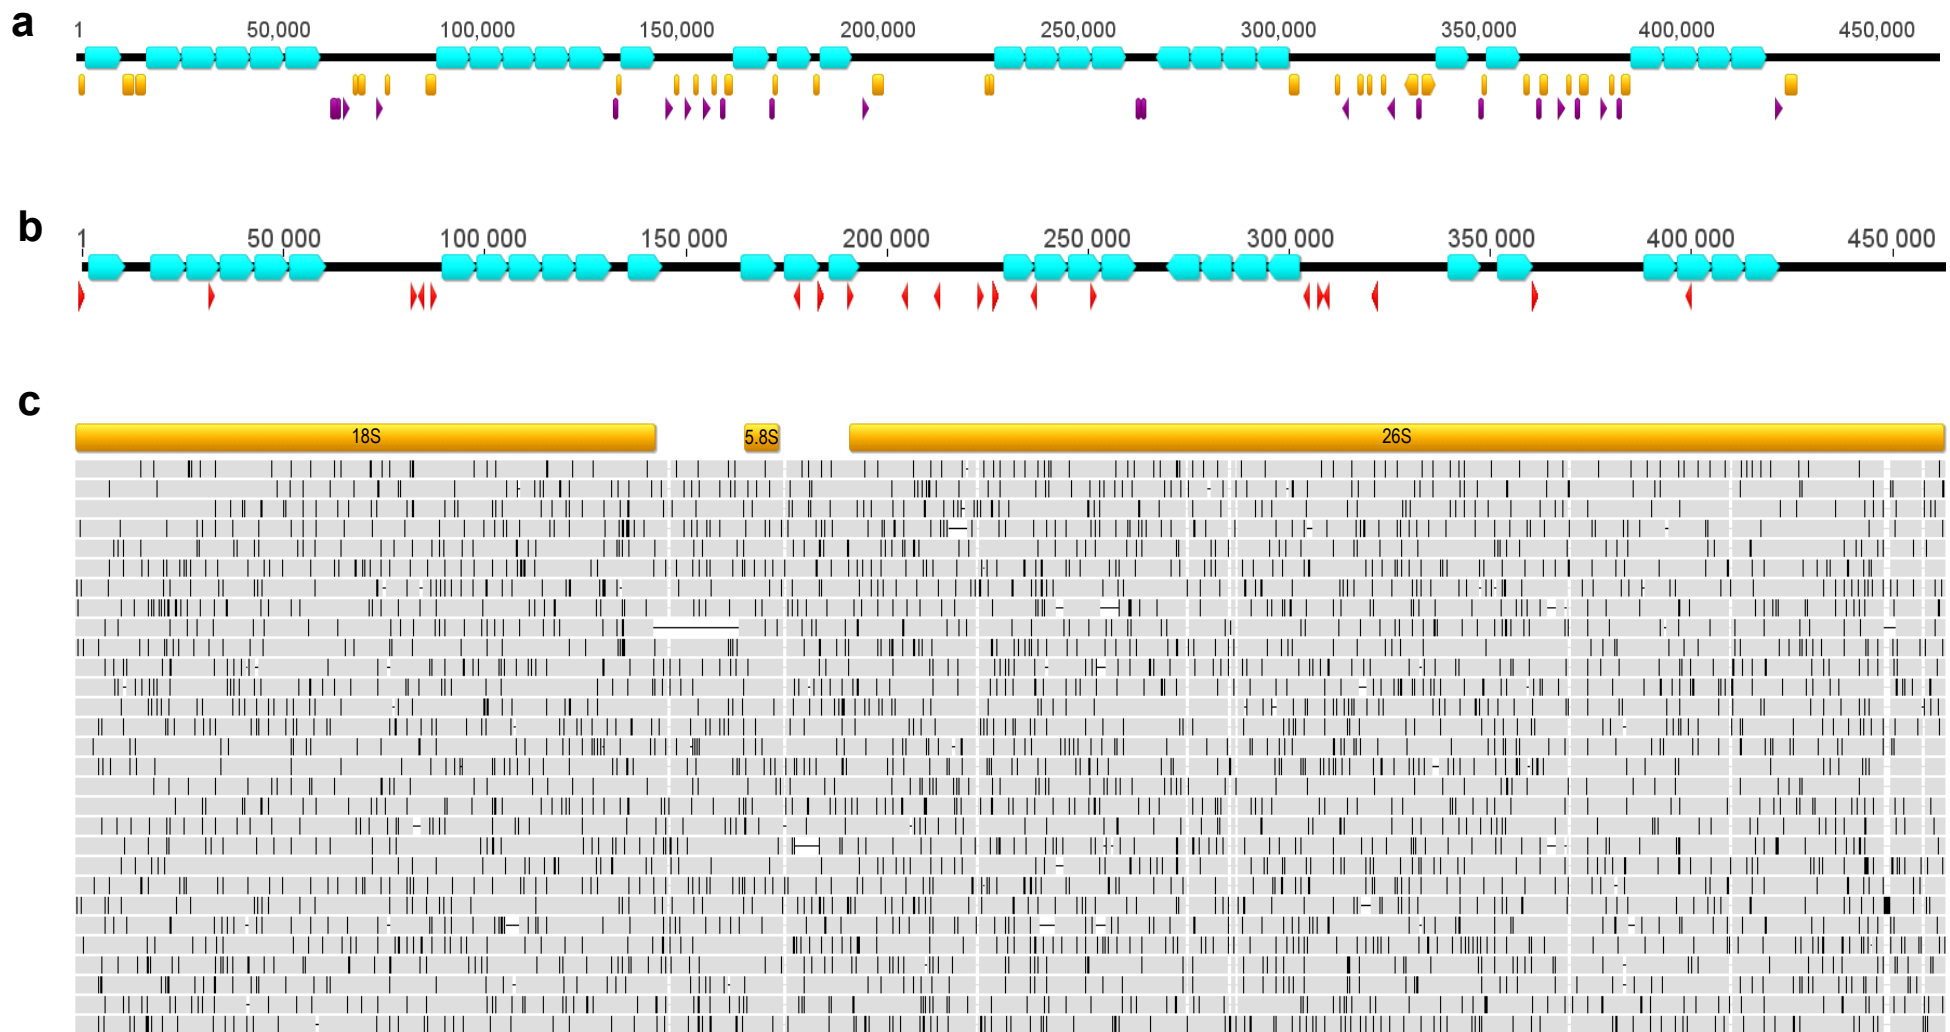

**Suppl. Figure S1. Degenerated ribosomal DNA array in the terminal part of chromosome arm 1AS.** (a) The 1AS rDNA array is composed of both complete (comprising all of 18S, 5.8S and 26S rRNA genes; blue boxes), and incomplete units. Separated 18S and 26S rRNA genes and gene fragments are marked purple and yellow, respectively. (b) Ribosomal DNA units (blue boxes) are interspersed by telomeric repeats (red triangles) of various orientation. (c) Comparison of 29 complete 45S rDNA units building the 1AS array shows a high degree of variability. Grey bars represent individual rDNA units, disagreements are highlighted by black lines. Gene annotation is shown above the alignment.

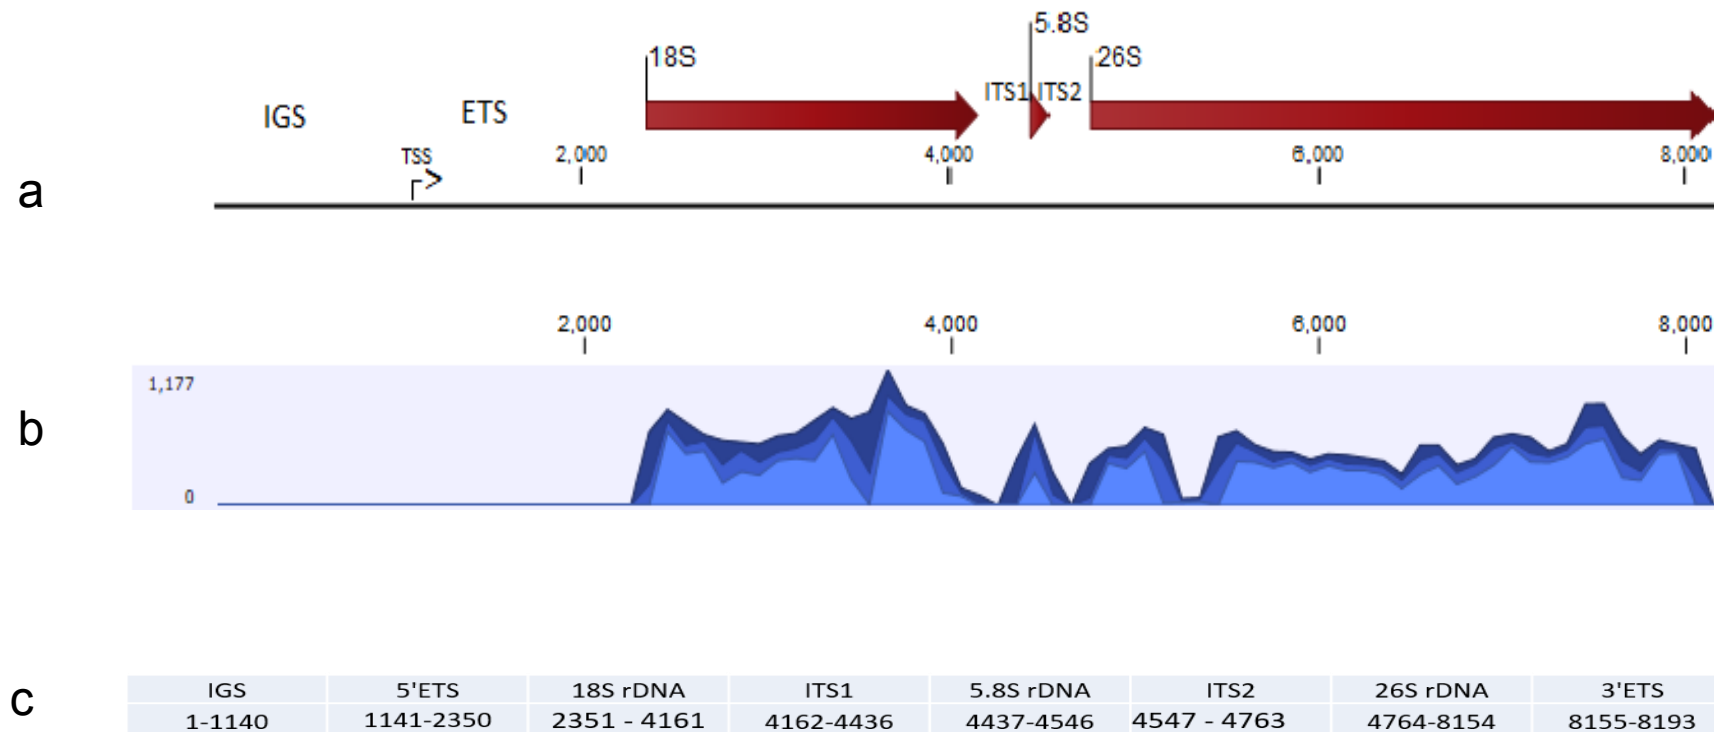

**Suppl Figure S2. Wheat consensus 45S rDNA unit and its coverage by RNA-seq reads** (a) Scheme of the consensus rDNA unit. Coding regions are depicted as brown arrows. Putative transcription start site is indicated in the position 1141 bp upstream from the 18S rRNA gene. (b) RNA-seq read coverage plot along the rDNA unit. Note, near absence of the ETS/IGS and ITS1/ITS2 transcripts. Both 18S and 26S rRNA genes were relatively equally covered except of a GC-rich subregion close to the 26S rRNA 5'-terminus. (c) Annotation of the rDNA unit

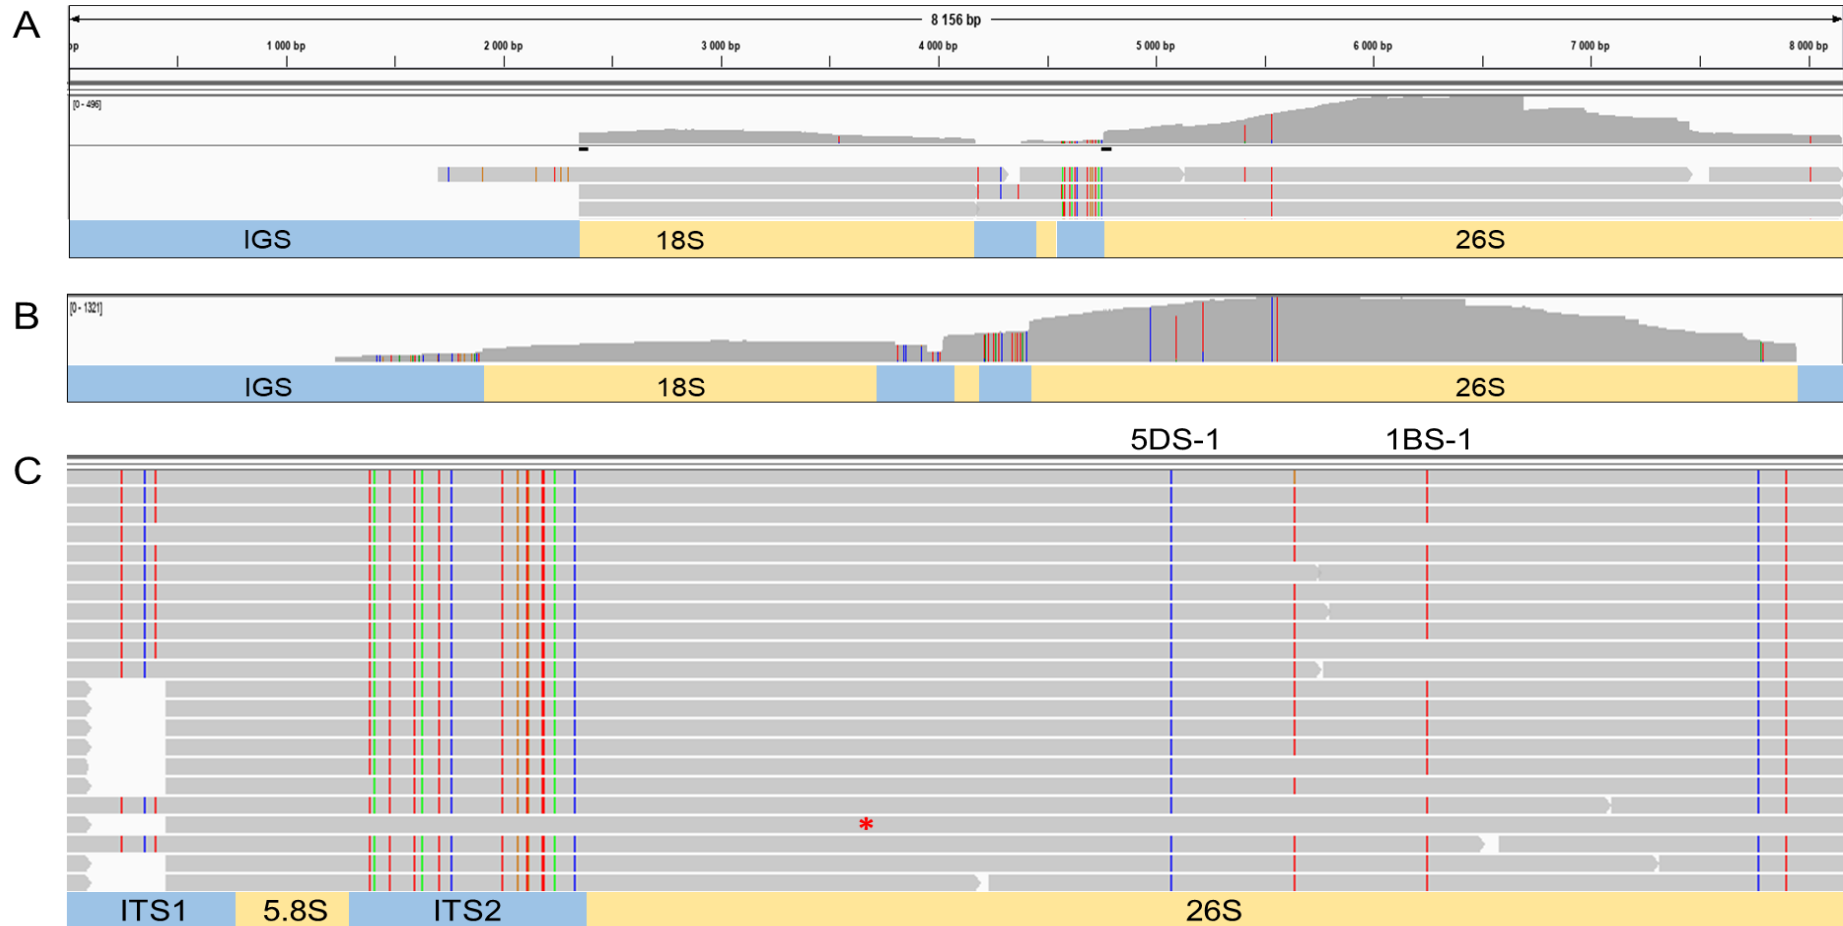

**Suppl. Figure S3. Mapping of IsoSeq reads to wheat consensus and 5DS rDNA units.** (a) Mapping of 801 CCS IsoSeq reads from PRJEB15048 (Clavijo et al. 2017), sample „Leaf“, to the wheat 45S rDNA consensus. Coverage of the unit by reads is shown in the top, example of reads in the middle and rDNA unit annotation in the bottom of the figure. (b) Total of 1951 CCS IsoSeq reads, sample „Seed“, mapped to the 5DS consensual 45S rDNA unit. (c) In five out of 1079 „Seed“ reads mapping to 5DS-1 position, we could unambiguously recognize the 5DS-specific haplotype. A read showing complete match with the 5DS rDNA consensus, both in ITS2 and 26S rRNA, is marked by red asterisk. The colored lines indicate allelic variants with respect to the applied reference.

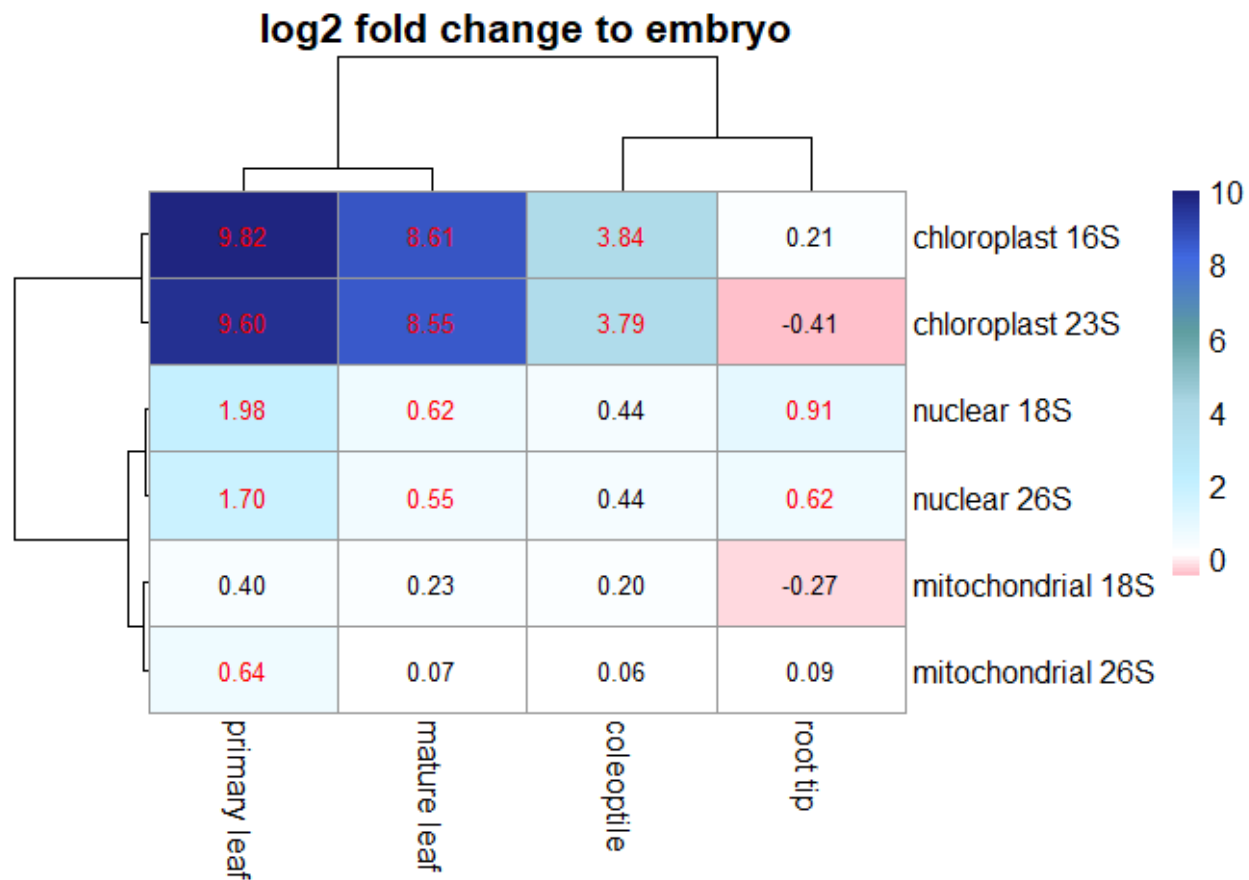

**Suppl. Figure S4. Nuclear, chloroplast and mitochondrial rRNA - Log2 fold change heatmap across five tissues.** The DESeq2 dataset clustered heatmap shows log2 fold transformed differences in amounts of 18/16S and 26/23S rRNA in each of the tissues related to the embryo. Color code of the values indicates padj values where red values correspond to  $p < 0.05$  that is considered as statistically significant. Blue shades mark increased expression whereas pink marks decreased expression related to the embryonic rRNA as indicated by the scale.

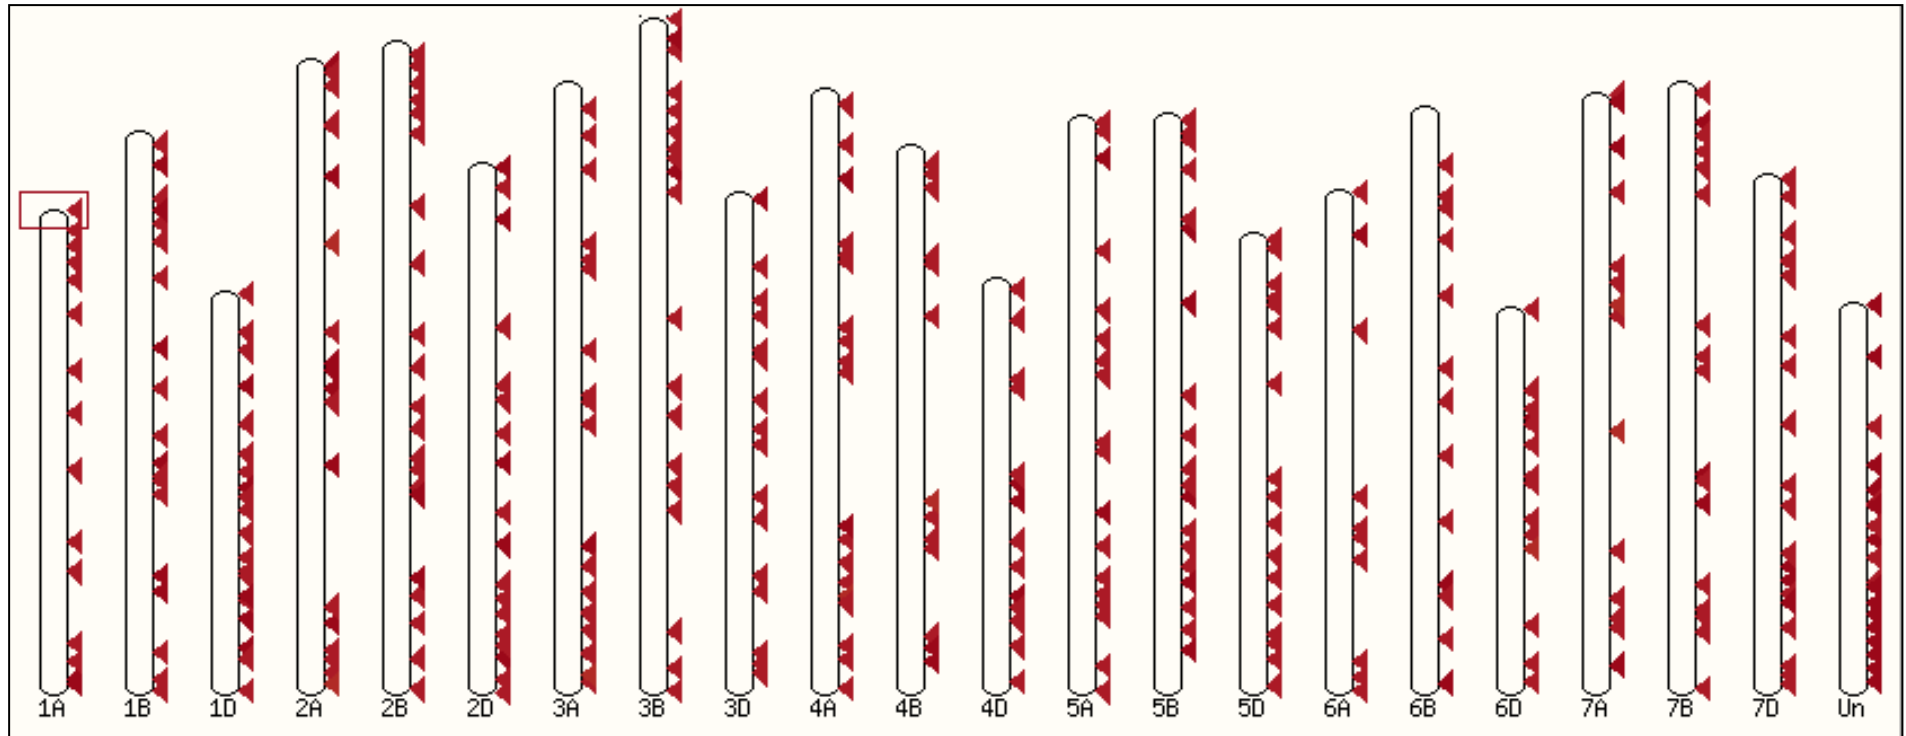

**Suppl. Figure S5. Graphical outcome of a BLAST search for sequences homologous to wheat consensus rDNA unit in the IWGSC RefSeq v1.0 genome.** The search was carried out in Ensembl Plants ([https://plants.ensembl.org/Triticum\\_aestivum/Tools/Blast](https://plants.ensembl.org/Triticum_aestivum/Tools/Blast)). Position of the irregular rDNA array in 1A is marked by a rectangle.
